# Supplementary material
Source: PubMed Central journal article supplement (PMC3589886)
Supplement: Supp_Fig1.pdf [file Supp_Fig1.pdf]

## Supplementary Data

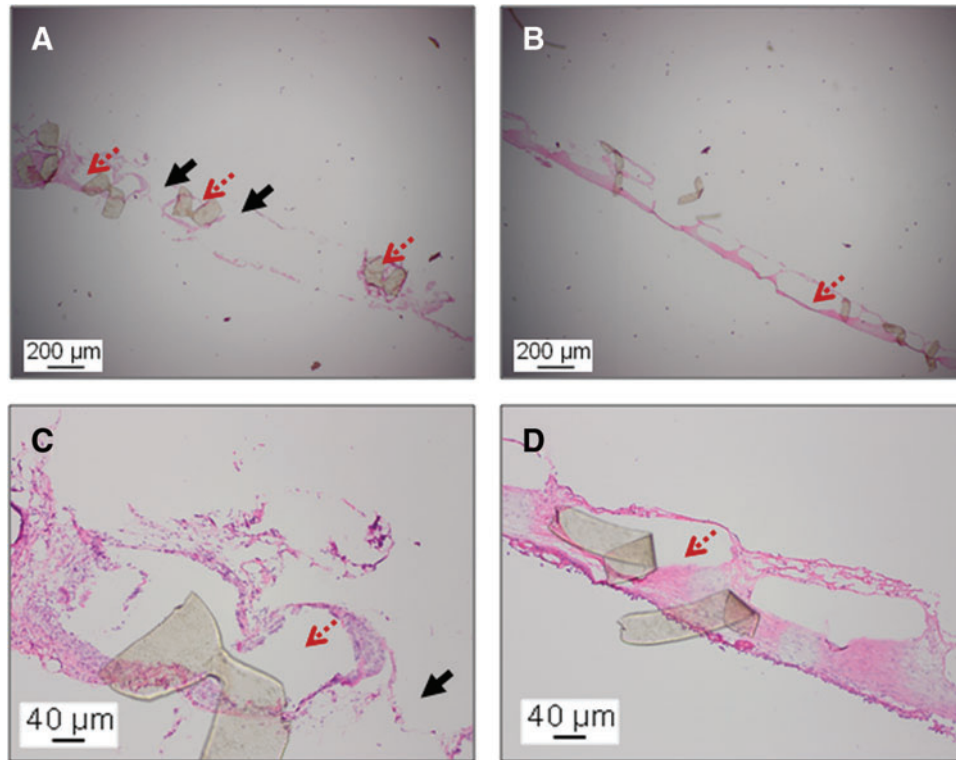

**SUPPLEMENTARY FIG. S1.** Tissue growth around and into some of the pores of PTFE pouches. Hematoxylin- and eosin (H&E)-stained cross-sectional images showing areas with higher amounts of generated tissue attached to the pouch wall for large-pore (A, C) and small-pore (B, D) pouches. These results demonstrate that the larger pores are less likely to occlude. The yellowish strips on the images are pieces of the PTFE pouch wall. Solid, black arrows show unoccluded pores, while dashed, red arrows indicate areas, where the PTFE pouch was located.
