# Supplementary material
Source: PubMed Central journal article supplement (PMC3589886)
Supplement: Supp_Fig2.pdf [file Supp_Fig2.pdf]

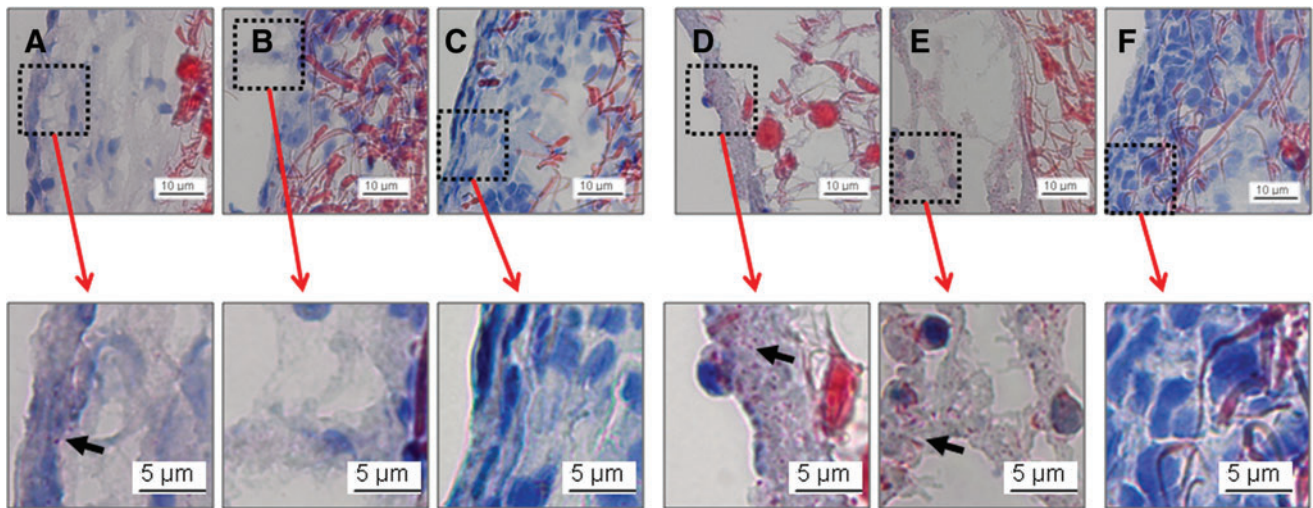

**SUPPLEMENTARY FIG. S2.** Impact of average fiber diameter and pouch pore size on the conduit lipid profile after 14 days in the peritoneal cavity. Shown are representative low- and high-magnification images of Oil Red O stained 14.5% w/v (A, D), 17% w/v (B, E), and 22% w/v (C, F) constructs. Oil red O stain shows nuclei (blue), lipid droplets (red, location shown by arrows), and electrospun fibers (red). Constructs are shown after insertion in larger (A–C) or smaller pore pouches (D–F). The outer surface of the construct is on the left side. The dotted squares in the low-magnification images show the areas that were enlarged.
