# Supplementary material
Source: PubMed Central journal article supplement (PMC3589886)
Supplement: Supp_Fig3.pdf [file Supp_Fig3.pdf]

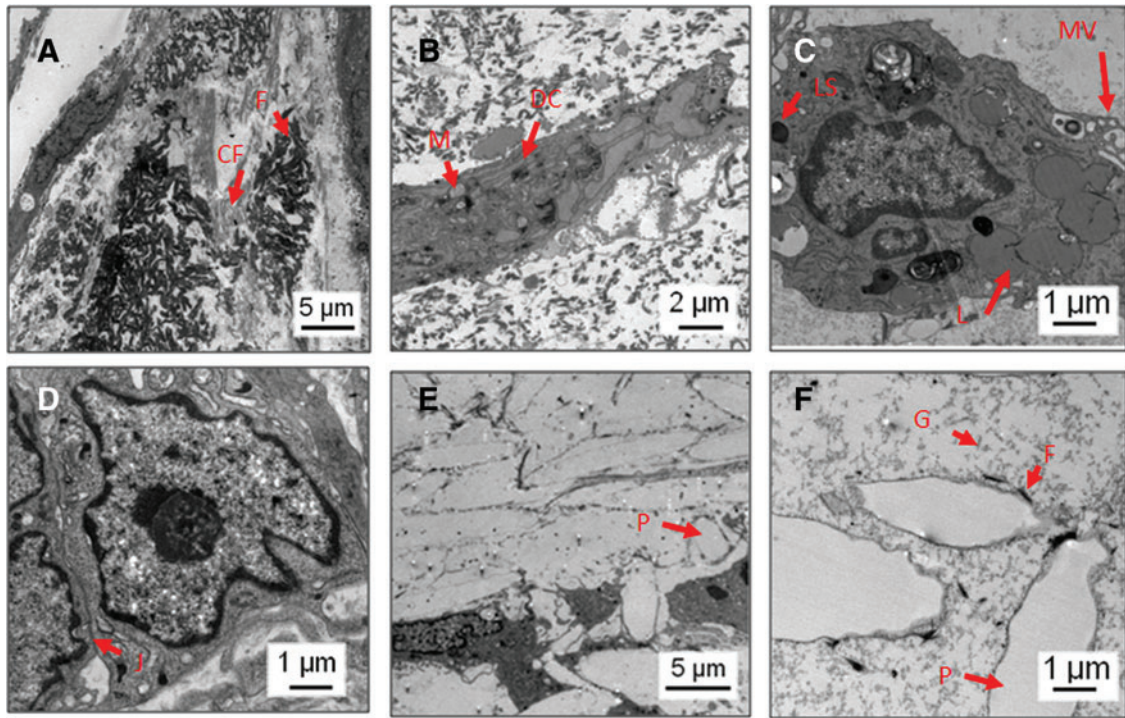

**SUPPLEMENTARY FIG. S3.** Cell phenotype and detailed matrix structure visualized using transmission electron microscopy. Included are representative images of peritoneal constructs showing components of the generated extracellular matrix (ECM) and fibroblastic cells (**A**, **B**) in the outer capsule. Macrophages (**C**) and mesothelial cells (**D**) also appear to be present. These matrix components and cell phenotypes were observed throughout conditions, although some differences in the quantity of individual components were observed. Fewer cells were present within the conduit wall (**E**, **F**). F, fibrin fibrils; G, ground substance; CF, collagen fibril; P, dissolved poly( $\epsilon$ -caprolactone) (PCL) fiber; MV, microvilli; L, lipid droplet; LS, lysosome; M, mitochondria; D, dilated cistern of granulated ER; J, gap junction.
