# Supplementary material
Source: PubMed Central journal article supplement (PMC3589886)
Supplement: Supp_Fig4.pdf [file Supp_Fig4.pdf]

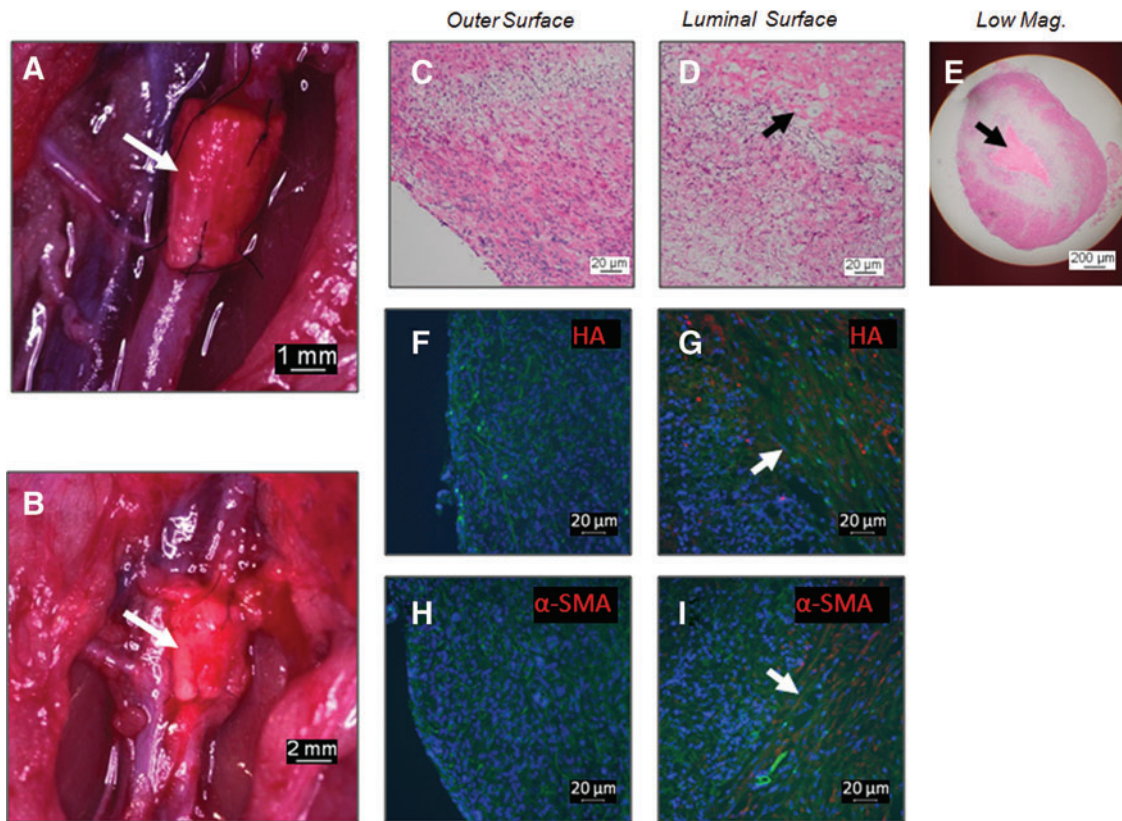

**SUPPLEMENTARY FIG. S4.** Remodeling of 22% w/v PCL constructs after autologous intra-aortal grafting. Representative images of constructs immediately after grafting (**A**) and 6 weeks later (**B**). Shown are luminal and outer surface images of grafts stained with H&E (**C–E**), hyaluronan-binding protein (**F, G**), and an  $\alpha$ -SMA antibody (**H, I**). For immunofluorescent images, 4',6-diamino-2-phenylindole dihydrochloride (DAPI)-stained nuclei (blue) and autofluorescent background (green) are also shown. Arrows indicate the graft (**A, B**) and the start of the lumen (**C–I**). The outer surface of the construct is on the left side.
